# Supplementary material for: Growth of the coccolithophore Emiliania huxleyi in light- andnutrient-limited batch reactors: relevance for the BIOSOPE deepecologicalniche of coccolithophores
Source: Copernicus journal article supplement (doi:10.5194/bg-13-5983-2016), 2016-11-02
Supplement: Supplementary file 1 [file bg-13-5983-2016-supplement.pdf]

Supplement of Biogeosciences, 13, 5983–6001, 2016  
<http://www.biogeosciences.net/13/5983/2016/>  
doi:10.5194/bg-13-5983-2016-supplement  
© Author(s) 2016. CC Attribution 3.0 License.

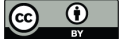

Biogeosciences  Open Access

*Supplement of*

## **Growth of the coccolithophore *Emiliana huxleyi* in light- and nutrient-limited batch reactors: relevance for the BIOSOPE deep ecological niche of coccolithophores**

**Laura Perrin et al.**

*Correspondence to:* Laura Perrin ([lpelod@locean-ipsl.upmc.fr](mailto:lpelod@locean-ipsl.upmc.fr))

The copyright of individual parts of the supplement might differ from the CC-BY 3.0 licence.

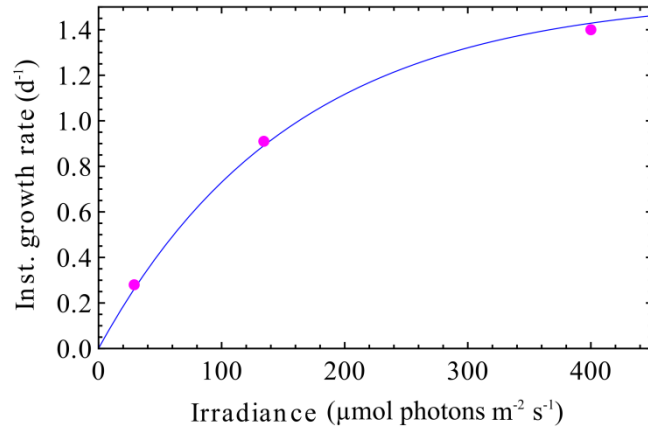

Figure S1. Instantaneous growth rate versus irradiance calculated with equation 10 ( $K_{lrr} = 157 \mu\text{mol photons m}^{-2} \text{s}^{-1}$ ). Pink points represent the irradiance and growth rate of the experiments carried out by Langer et al. (2013) and our experiments. The blue line is the result of equation 10.

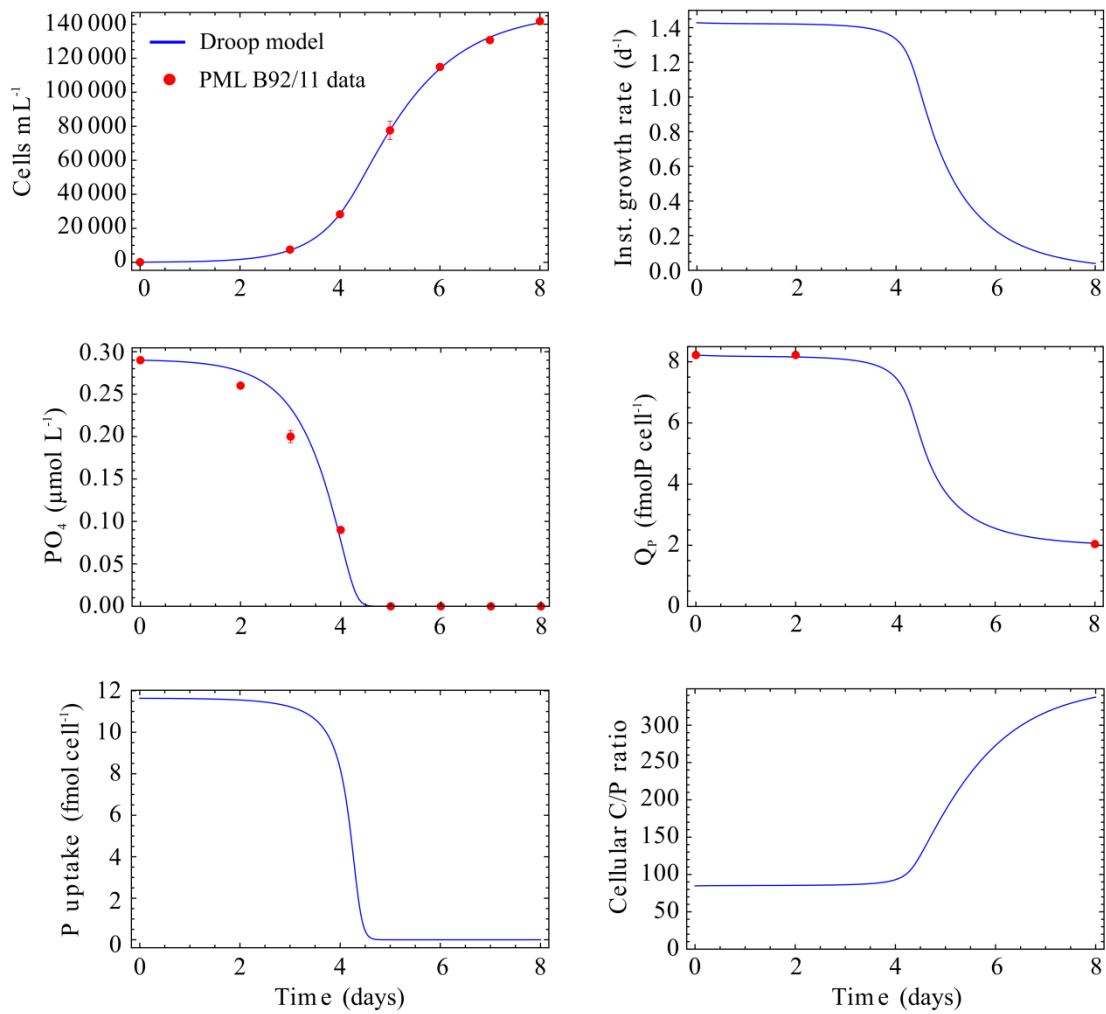

Figure S2. Model fitted to the data of the phosphate-limited cultures of Langer et al. (2013).

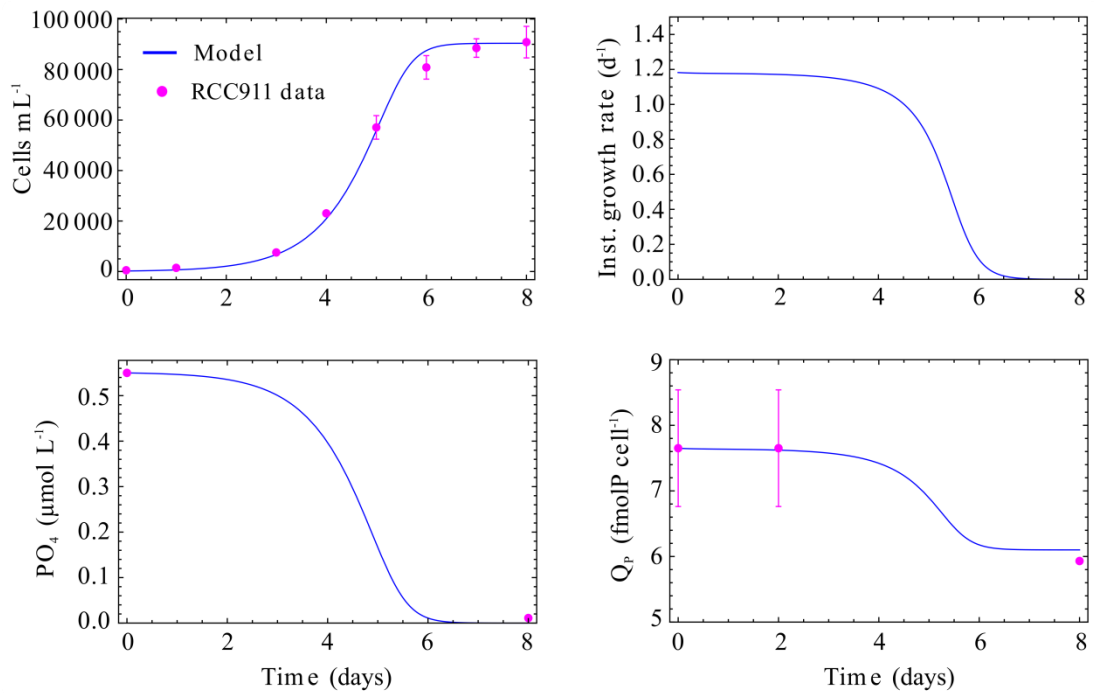

Figure S3. Model fitted to the data of the phosphate-limited cultures of strain RCC911 in high light conditions.

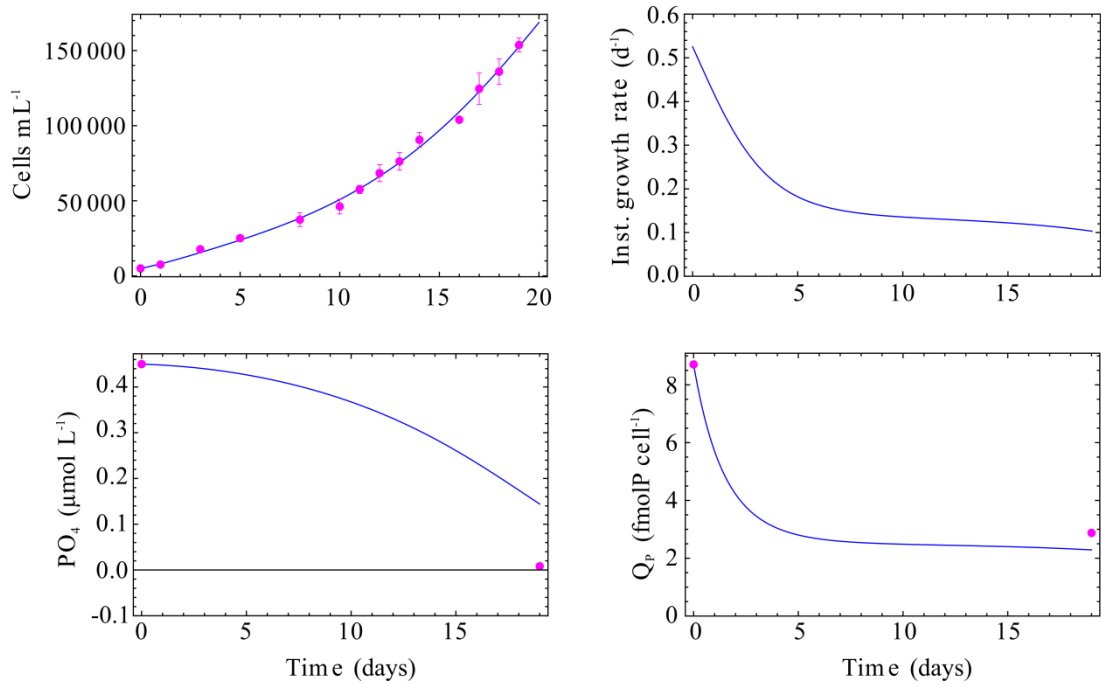

Figure S4. Model fitted to the data of the phosphate-limited cultures of strain RCC911 in low light conditions.

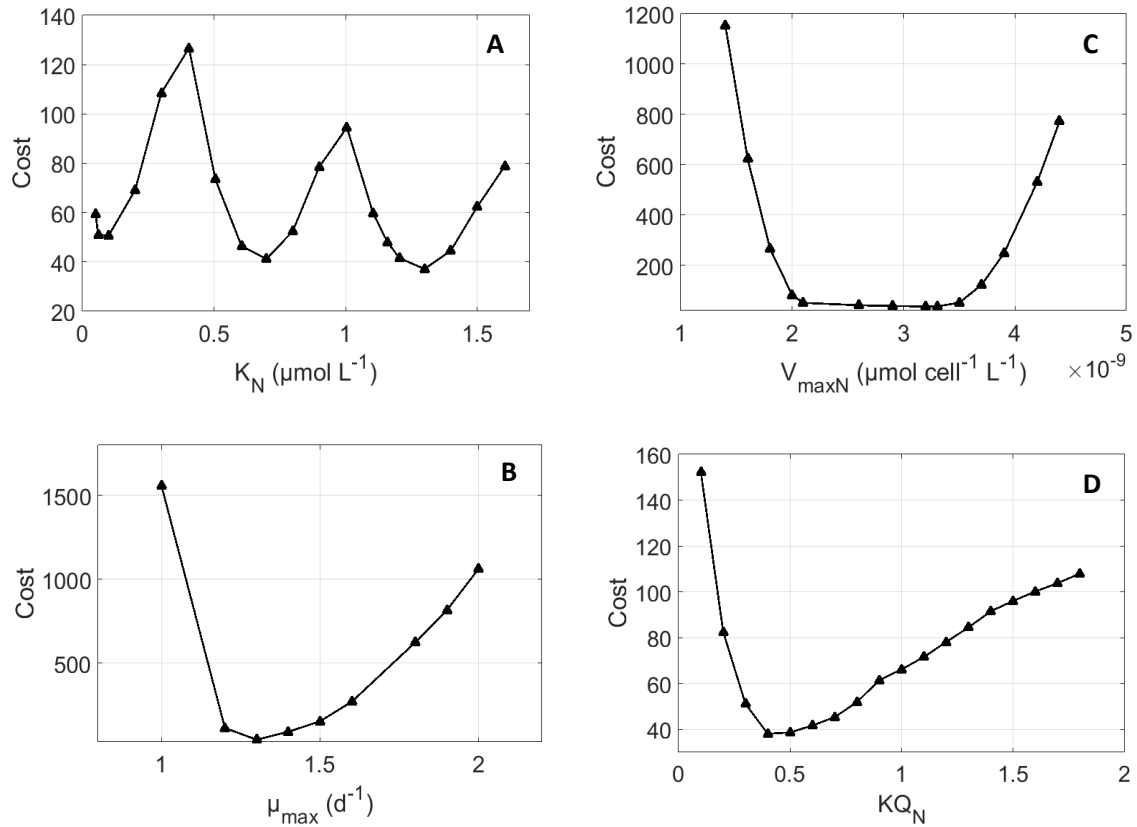

Figure S5. Variability of  $K_N$  (A),  $V_{\text{maxN}}$  (B),  $\mu_{\text{max}}$  (C) and  $KQ_N$  (D) for the Langer et al. (2013) PML B92/11 experiment in nitrate-limited conditions.

Table S1. Cell, coccospere volume and DSL ( $n=100$  for coccospere/cell measurements and  $n=300$  for coccoliths measurements) at the end of our experiments. No measurement of coccospere and DSL for control experiment in low light.

| Sample            | Cell volume     |       | Coccospere volume |      | DSL           |      |
|-------------------|-----------------|-------|-------------------|------|---------------|------|
|                   | $\mu\text{m}^3$ | std   | $\mu\text{m}^3$   | std  | $\mu\text{m}$ | std  |
| <b>High light</b> |                 |       |                   |      |               |      |
| Control           | 49.97           | 16.38 | 109.5             | 23.3 | 3.05          | 0.24 |
| $\text{PO}_4$ lim | 77.21           | 19.89 | 260.5             | 88.2 | 3.27          | 0.27 |
| $\text{NO}_3$ lim | 47.33           | 11.13 | 139.2             | 41.2 | 2.78          | 0.24 |
| <b>Low light</b>  |                 |       |                   |      |               |      |
| Control           | 33.69           | 10.09 |                   |      |               |      |
| $\text{PO}_4$ lim | 55.64           | 14.42 | 168.6             | 50.0 | 3.10          | 0.27 |
| $\text{NO}_3$ lim | 31.09           | 8.25  | 85.4              | 24.7 | 2.64          | 0.21 |
